# Supplementary material
Source: PubMed Central journal article supplement (PMC6379130)

Supplemental Figure 1

### Non-Parenchymal

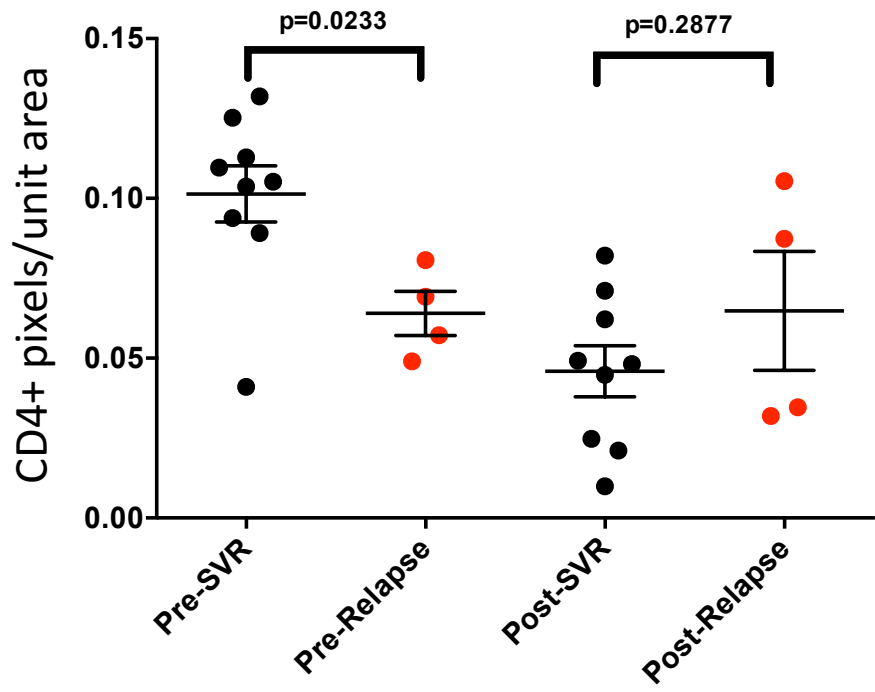

Supplemental Figure 2

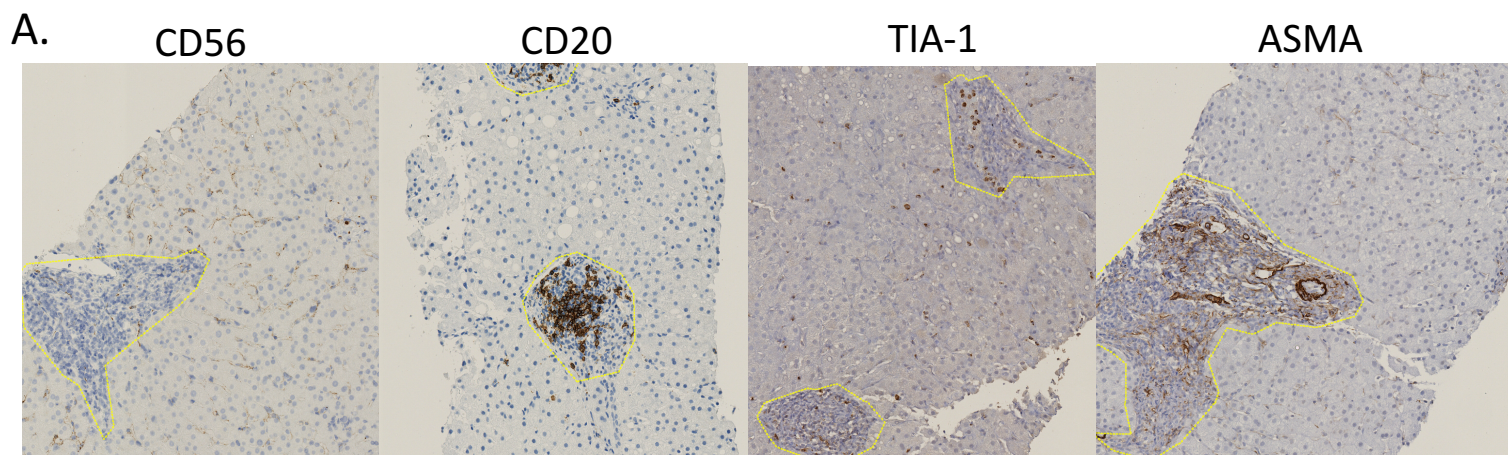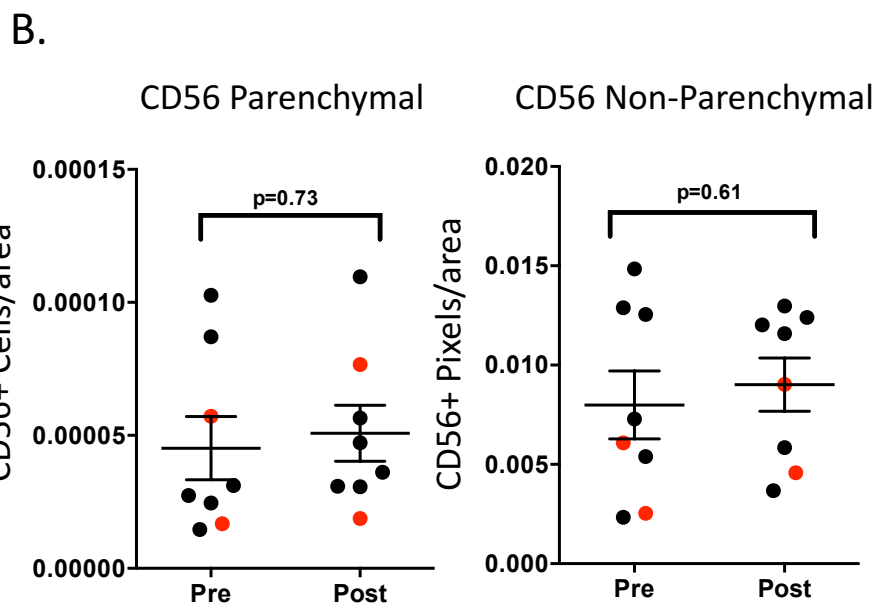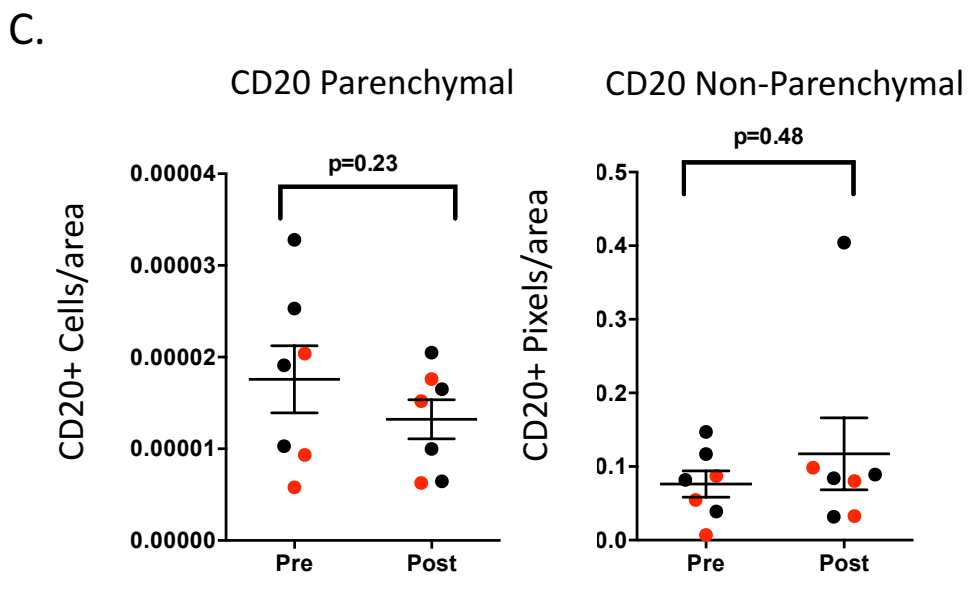

Supplement: NIHMS995687-supplement-Supp_figS1-2.pdf [file NIHMS995687-supplement-Supp_figS1-2.pdf]
